# Supplementary material for: Disentangling the interplay of positive and negative selection forces that shaped mitochondrial genomes of Gammarus pisinnus and Gammarus lacustris
Source: R Soc Open Sci. 2020 Jan 8;7(1):190669. doi: 10.1098/rsos.190669 (PMC7029888; doi:10.1098/rsos.190669)
Supplement: Additional file 1. Datasets and comparative analyses of Senticaudata mitogenomes. [file rsos190669supp1.xlsx]

## Sheet: A
Additional file 1. Datasets and comparative analyses of Senticaudata mitogenomes.
Worksheet A: Accession numbers, taxonomy and basic statistics for the Senticaudata and Gammaroidea datasets.
Worksheet B: Comparative gene statistics for the studied Senticaudata mitogenomes: length, start/stop codons, skews and base composition.
Accession numbers, taxonomy and basic statistics for the Senticaudata dataset.
ID	Organism	Class	Order	Infraorder	Superfamily	Family	Length	AT%
MK354235	Gammarus lacustris	Malacostraca	Amphipoda	Senticaudata	Gammaroidea	Gammaridae	15333	64.3
MK354236	Gammarus pisinnus	Malacostraca	Amphipoda	Senticaudata	Gammaroidea	Gammaridae	15907	70
NC_017760	Gammarus duebeni	Malacostraca	Amphipoda	Senticaudata	Gammaroidea	Gammaridae	15651	64
NC_019660	Metacrangonyx remyi	Malacostraca	Amphipoda	Senticaudata	Hadzioidea	Metacrangonyctidae	14787	70.8
NC_019662	Pseudoniphargus daviui	Malacostraca	Amphipoda	Senticaudata	Allocrangonyctoidea	Pseudoniphargidae	15157	68.7
NC_023104	Eulimnogammarus verrucosus	Malacostraca	Amphipoda	Senticaudata	Gammaroidea	Eulimnogammaridae	15315	69
NC_025564	Eulimnogammarus vittatus	Malacostraca	Amphipoda	Senticaudata	Gammaroidea	Eulimnogammaridae	15534	67.4
NC_026309	Brachyuropus grewingkii	Malacostraca	Amphipoda	Senticaudata	Gammaroidea	Acanthogammaridae	17118	62.2
NC_030261	Stygobromus indentatus	Malacostraca	Amphipoda	Senticaudata	Crangonyctoidea	Crangonyctidae	14638	69.3
NC_033360	Eulimnogammarus cyaneus	Malacostraca	Amphipoda	Senticaudata	Gammaroidea	Eulimnogammaridae	14370	67.6
NC_033361	Gmelinoides fasciatus	Malacostraca	Amphipoda	Senticaudata	Gammaroidea	Micruropodidae	18114	65.9
NC_033362	Pallaseopsis kessleri	Malacostraca	Amphipoda	Senticaudata	Gammaroidea	Pallaseidae	15759	63.1
NC_034937	Gammarus fossarum	Malacostraca	Amphipoda	Senticaudata	Gammaroidea	Gammaridae	15989	65.2
NC_037481	Gammarus roeselii	Malacostraca	Amphipoda	Senticaudata	Gammaroidea	Gammaridae	16073	66.8
NC_039353	Pseudoniphargus carpalis	Malacostraca	Amphipoda	Senticaudata	Allocrangonyctoidea	Pseudoniphargidae	14861	67.3
NC_039354	Pseudoniphargus stocki	Malacostraca	Amphipoda	Senticaudata	Allocrangonyctoidea	Pseudoniphargidae	14697	70.3
NC_039646	Pseudocrangonyx daejeonensis	Malacostraca	Amphipoda	Senticaudata	Crangonyctoidea	Pseudocrangonyctidae	15069	68
Accession numbers, taxonomy and basic statistics for the Gammaroidea dataset.
ID	Organism	Superfamily	Family	Subfamily	Full length (bp)	A (%)	T (%)	C (%)	G (%)	A+T (%)	G+C (%)	AT skew	GC skew
KX341962.1	Acanthogammarus victorii	Gammaroidea	Acanthogammaridae	Acanthogammarinae	17424	30.4	28.8	25.5	15.2	59.2	40.7	0.027	-0.251
NC_026309.1	Brachyuropus grewingkii	Gammaroidea	Acanthogammaridae	Acanthogammarinae	17118	31.2	31	24.7	13.1	62.2	37.8	0.003	-0.307
KX341963.1	Crypturopus tuberculatus	Gammaroidea	Micruropodidae	Crypturopodinae	13864	26.7	30.7	21.6	21	57.4	42.6	-0.07	-0.013
NC_033360.1	Eulimnogammarus cyaneus	Gammaroidea	Eulimnogammaridae	Eulimnogammarinae	14370	33.1	34.5	20.3	12.1	67.6	32.4	-0.019	-0.251
NC_023104.1	Eulimnogammarus verrucosus	Gammaroidea	Eulimnogammaridae	Eulimnogammarinae	15315	34.2	34.8	19.2	11.8	69	31	-0.008	-0.238
NC_025564.1	Eulimnogammarus vittatus	Gammaroidea	Eulimnogammaridae	Eulimnogammarinae	15534	33.2	34.2	19.9	12.7	67.4	32.6	-0.015	-0.222
NC_017760.1	Gammarus duebeni	Gammaroidea	Gammaridae	N/A	15651	31.5	32.5	22	14	64	36	-0.016	-0.223
NC_034937.1	Gammarus fossarum	Gammaroidea	Gammaridae	N/A	15989	33.2	32	22	12.9	65.2	34.9	0.018	-0.261
this study	Gammarus lacustris	Gammaroidea	Gammaridae	N/A	15333	31.7	32.6	22.6	13.2	64.3	35.8	-0.014	-0.263
this study	Gammarus pisinnus	Gammaroidea	Gammaridae	N/A	15907	32.6	37.4	19.6	10.3	70	29.9	-0.068	-0.31
NC_037481.1	Gammarus roeselii	Gammaroidea	Gammaridae	N/A	16073	33.9	32.9	20.9	12.3	66.8	33.2	0.016	-0.259
KX341965.1	Garjajewia cabanisii	Gammaroidea	Acanthogammaridae	Plesiogammarinae	17576	32.4	32.5	22.6	12.5	64.9	35.1	-0.002	-0.286
NC_033361.1	Gmelinoides fasciatus	Gammaroidea	Micruropodidae	Gmelinoidinae	18114	32.9	33	22.2	11.9	65.9	34.1	-0.001	-0.303
KX341967.1	Linevichella vortex	Gammaroidea	Micruropodidae	Micruropodinae	11444	31.4	33.2	21.7	13.8	64.6	35.5	-0.028	-0.223
NC_033362.1	Pallaseopsis kessleri	Gammaroidea	Pallaseidae	N/A	15759	31.9	31.2	21.8	15.1	63.1	36.9	0.011	-0.182
NC_019660.1	Metacrangonyx remyi	Hadzioidea	Metacrangonyctidae	N/A	14787	34.9	35.9	14.4	14.9	70.8	29.3	-0.014	0.017

## Sheet: B
Worksheet B: Comparative gene statistics for the studied Senticaudata mitogenomes: length, start/stop codons, skews and base composition.
Species are represented by acronyms of their binomial scientific names (see footnote). The two new sequences (G_l and G_p) are shaded grey.
Genus	Gammarus	Gammarus	Gammarus	Metacrangonyx	Pseudoniphargus	Eulimnogammarus	Eulimnogammarus	Brachyuropus	Stygobromus	Eulimnogammarus	Gmelinoides	Pallaseopsis	Gammarus	Gammarus	Pseudoniphargus	Pseudoniphargus	Pseudocrangonyx
Species	G_l	G_p	G_d	M_r	P_dav	E_ve	E_vi	B_g	S_i	E_c	G_fa	P_k	G_fo	G_r	P_c	P_s	P_dae
Length of PCGs (bp)
atp6	672	672	672	669	672	669	669	669	669	669	669	669	669	672	672	672	669
atp8	159	156	159	159	159	156	156	156	177	156	153	156	159	159	159	159	159
cox1	1537	1537	1537	1537	1537	1534	1537	1537	1537	1534	1572	1537	1534	1543	1537	1537	1539
cox2	679	679	679	687	667	682	682	682	675	682	691	682	678	679	667	667	691
cox3	786	786	786	789	789	786	786	786	798	786	786	786	786	786	789	789	825
cytb	1135	1137	1117	1137	1140	1137	1137	1135	1132	1137	1137	1137	1140	1137	1140	1140	1155
nad1	912	933	913	924	924	924	933	933	921	933	939	936	933	933	921	927	936
nad2	982	982	985	988	973	982	982	982	985	982	985	982	985	943	976	976	979
nad3	354	354	354	354	349	354	354	352	378	354	354	354	354	354	351	351	346
nad4	1315	1315	1308	1318	1294	1299	1309	1309	1326	1309	1315	1303	1300	1213	1294	1294	1315
nad4L	297	294	294	291	291	291	294	294	294	294	294	294	294	291	291	291	291
nad5	1713	1719	1713	1709	1708	1710	1713	1713	1708	1713	1710	1695	1707	1684	1708	1708	1725
nad6	504	501	507	498	501	498	498	504	504	498	489	501	495	495	501	498	480
Length of rRNA genes (bp)
rrnL	980	988	986	1045	1012	982	984	982	1035	979	976	977	983	980	1012	1012	1091
rrnS	750	717	637	683	698	620	622	626	669	628	618	620	1631	646	708	699	783
Putative start codon
atp6	ATG	TTG	ATG	ATG	ATG	ATG	ATG	ATG	ATA	ATG	ATG	ATG	ATA	ATG	ATG	ATG	ATG
atp8	ATT	ATA	ATA	GTG	ATA	GTG	GTG	GTG	ATT	GTG	ATC	ATT	ATC	ATA	ATC	ATC	ATA
cox1	ATC	ATA	ATA	ATC	ATT	ATT	ATT	ATT	ATT	ATC	ATA	ATT	ATA	ATT	ATT	ATT	ATT
cox2	TTG	ATT	TTG	ATT	TTG	TTG	TTG	TTG	ATA	TTG	TTG	GTG	TTG	TTG	TTG	TTG	ATT
cox3	ATG	ATG	ATG	ATG	ATG	ATG	ATG	ATG	ATG	ATG	ATG	ATG	ATG	ATG	ATG	ATG	ATG
cytb	ATG	ATG	ATG	ATG	ATG	ATG	ATG	ATG	ATG	ATG	ATG	ATG	ATA	ATG	ATG	ATG	ATG
nad1	TTG	TTG	ATA	ATA	ATA	ATT	TTG	TTG	GTG	TTG	ATA	TTG	TTG	TTG	TTG	TTG	ATT
nad2	TTG	TTG	TTG	ATA	ATC	TTG	TTG	TTG	ATT	TTG	TTG	TTG	TTG	ATT	ATT	ATT	ATG
nad3	ATG	ATG	ATG	ATT	TTG	ATG	ATG	ATG	ATA	ATG	ATG	ATG	ATG	ATA	TTG	TTG	ATA
nad4	ATG	TTG	ATA	ATG	ATA	ATA	ATG	ATG	ATT	ATG	GTG	TTG	ATA	ATG	ATA	ATG	TTG
nad4L	ATA	ATG	ATG	ATG	ATG	ATA	ATG	ATG	ATG	ATG	ATG	ATG	ATG	ATG	ATG	ATG	ATG
nad5	GTG	TTG	GTG	CTG	TTG	ATA	TTG	ATT	GTG	GTG	ATG	TTG	TTG	ATT	TTG	TTG	ATA
nad6	ATG	ATG	ATG	ATT	AAT	ATG	ATG	GTG	ATG	ATG	ATG	ATT	ATG	ATT	ATG	ATG	ATG
Putative terminal codon
atp6	TAA	TAA	TAA	TAA	TAA	TAA	TAA	TAA	TAA	TAA	TAA	TAG	TAA	TAA	TAA	TAA	TAA
atp8	TAA	TAA	TAA	TAA	TAG	TAA	TAA	TAA	TAG	TAA	TAA	TAA	TAG	TAA	TAG	TAG	TAA
cox1	T	T	T	T	T	T	T	T	T	T	TAA	T	T	T	T	T	TAA
cox2	T	T	T	TAA	T	T	T	T	TAA	T	T	T	TAG	T	T	T	T
cox3	TAA	TAA	TAA	TAA	TAA	TAA	TAA	TAG	TAG	TAA	TAA	TAA	TAA	TAG	TAA	TAA	TAA
cytb	T	TAA	T	TAA	TAA	TAA	TAA	T	T	TAA	TAG	TAG	TAG	TAG	TAG	TAA	TAA
nad1	TAA	TAA	T	TAA	TAA	TAA	TAG	TAG	TAA	TAA	TAA	TAA	TAG	TAG	TAG	TAA	TAA
nad2	T	T	T	T	T	T	T	T	T	T	T	T	T	T	T	T	T
nad3	TAG	TAG	TAG	TAG	T	TAG	TAG	T	TAA	TAG	TAG	TAG	TAG	TAG	TAG	TAG	T
nad4	T	T	TAA	T	T	TAA	T	T	TAG	T	T	T	T	T	T	T	T
nad4L	TAA	TAG	TAG	TAA	TAA	TAA	TAA	TAA	TAA	TAA	TAA	TAA	TAG	TAG	TAA	TAA	TAG
nad5	TAA	TAA	TAA	TA	T	TAA	TAA	TAG	T	TAA	TAA	TAA	TAA	T	T	T	TAA
nad6	TAA	TAA	TAA	TAA	TAA	TAA	TAA	TAA	TAA	TAA	TAA	TAA	TAA	TAA	TAA	TAA	TAA
Species	G_l	G_p	G_d	M_r	P_dav	E_ve	E_vi	B_g	S_i	E_c	G_fa	P_k	G_fo	G_r	P_c	P_s	P_dae
AT skew
atp6	-0.133	-0.205	-0.153	-0.22	-0.201	-0.148	-0.169	-0.195	-0.089	-0.14	-0.151	-0.148	-0.14	-0.067	-0.179	-0.181	-0.14
atp8	-0.067	-0.221	-0.101	0.025	-0.086	0.008	-0.009	-0.038	-0.068	-0.043	-0.02	-0.18	-0.02	0.036	-0.151	-0.122	-0.25
cox1	-0.192	-0.196	-0.195	-0.196	-0.177	-0.177	-0.172	-0.145	-0.161	-0.176	-0.126	-0.14	-0.125	-0.131	-0.193	-0.177	-0.112
cox2	-0.084	-0.103	-0.072	-0.164	-0.115	-0.049	-0.057	-0.042	-0.051	-0.076	-0.086	-0.035	-0.039	-0.007	-0.109	-0.118	-0.071
cox3	-0.134	-0.241	-0.147	-0.209	-0.174	-0.155	-0.153	-0.137	-0.124	-0.163	-0.156	-0.164	-0.086	-0.096	-0.151	-0.147	-0.104
cytb	-0.111	-0.212	-0.157	-0.161	-0.084	-0.088	-0.126	-0.131	-0.079	-0.133	-0.139	-0.141	-0.129	-0.105	-0.097	-0.095	-0.103
nad1	-0.174	-0.062	-0.203	-0.177	-0.275	-0.171	-0.151	-0.152	-0.232	-0.12	-0.197	-0.14	-0.24	-0.24	-0.266	-0.256	-0.192
nad2	-0.175	-0.208	-0.208	-0.242	-0.205	-0.176	-0.169	-0.117	-0.146	-0.149	-0.129	-0.146	-0.152	-0.118	-0.281	-0.24	-0.138
nad3	-0.116	-0.238	-0.208	-0.187	-0.209	-0.14	-0.151	-0.136	-0.092	-0.172	-0.126	-0.077	-0.102	-0.058	-0.247	-0.13	-0.07
nad4	-0.209	-0.139	-0.171	-0.188	-0.178	-0.188	-0.189	-0.214	-0.207	-0.177	-0.174	-0.193	-0.264	-0.175	-0.192	-0.173	-0.18
nad4L	-0.147	-0.06	-0.196	-0.194	-0.211	-0.204	-0.127	-0.168	-0.207	-0.163	-0.188	-0.2	-0.214	-0.227	-0.211	-0.174	-0.182
nad5	-0.147	-0.067	-0.131	-0.149	-0.15	-0.098	-0.109	-0.165	-0.149	-0.092	-0.105	-0.146	-0.157	-0.149	-0.132	-0.148	-0.142
nad6	-0.283	-0.258	-0.194	-0.21	-0.174	-0.138	-0.172	-0.217	-0.066	-0.211	-0.164	-0.137	-0.135	-0.163	-0.161	-0.106	-0.171
rRNAs	-0.013	0.051	-0.037	0.002	-0.076	-0.072	-0.072	-0.074	-0.081	-0.095	-0.031	-0.071	-0.022	-0.087	-0.058	-0.079	-0.034
rrnL	-0.019	0.004	-0.032	0.036	-0.106	-0.065	-0.057	-0.084	-0.089	-0.078	-0.06	-0.058	-0.094	-0.087	-0.077	-0.13	-0.034
rrnS	-0.006	0.115	-0.045	-0.052	-0.033	-0.084	-0.098	-0.057	-0.07	-0.125	0.017	-0.094	0.016	-0.087	-0.033	-0.007	-0.034
tRNAs	0.009	0.023	0.035	0.043	0.033	0.004	0.022	0.018	-0.017	0.029	0.04	0.027	0.017	0.039	0.039	0.033	-0.003
GC skew
atp6	-0.363	-0.411	-0.313	0.056	-0.324	-0.355	-0.28	-0.365	-0.314	-0.362	-0.249	-0.273	-0.333	-0.333	-0.3	-0.374	-0.365
atp8	-0.259	-0.581	-0.28	-0.263	-0.296	-0.314	-0.436	-0.462	-0.682	-0.317	-0.472	-0.321	-0.356	-0.447	-0.509	-0.667	-0.447
cox1	-0.059	-0.099	-0.068	0.088	-0.112	-0.048	-0.062	-0.123	-0.122	-0.049	-0.095	-0.075	-0.122	-0.09	-0.093	-0.091	-0.188
cox2	-0.254	-0.241	-0.266	0.112	-0.283	-0.178	-0.224	-0.297	-0.166	-0.161	-0.165	-0.135	-0.242	-0.258	-0.135	-0.282	-0.28
cox3	-0.191	-0.199	-0.101	0.129	-0.153	-0.168	-0.134	-0.144	-0.1	-0.15	-0.229	-0.144	-0.148	-0.117	-0.151	-0.203	-0.233
cytb	-0.258	-0.304	-0.233	-0.234	-0.335	-0.189	-0.217	-0.301	-0.213	-0.207	-0.247	-0.175	-0.22	-0.233	-0.232	-0.292	-0.307
nad1	0.36	0.449	0.354	0.191	0.433	0.352	0.323	0.343	0.455	0.399	0.341	0.206	0.341	0.338	0.418	0.503	0.404
nad2	-0.264	-0.342	-0.148	0.155	-0.309	-0.174	-0.195	-0.268	-0.305	-0.233	-0.423	-0.246	-0.27	-0.284	-0.233	-0.275	-0.441
nad3	-0.185	-0.13	-0.116	0.13	-0.105	-0.179	-0.086	-0.151	-0.228	-0.118	-0.288	-0.137	-0.188	-0.13	-0.183	-0.333	-0.237
nad4	0.41	0.465	0.342	0.054	0.421	0.421	0.314	0.396	0.34	0.382	0.439	0.212	0.402	0.367	0.413	0.511	0.421
nad4L	0.355	0.519	0.44	0.318	0.538	0.444	0.32	0.505	0.472	0.449	0.392	0.327	0.545	0.571	0.589	0.562	0.614
nad5	0.369	0.466	0.272	-0.025	0.441	0.332	0.309	0.364	0.362	0.308	0.401	0.212	0.308	0.345	0.355	0.497	0.435
nad6	-0.267	-0.407	-0.288	-0.15	-0.507	-0.399	-0.253	-0.4	-0.408	-0.301	-0.373	-0.17	-0.303	-0.38	-0.479	-0.53	-0.513
rRNAs	-0.013	0.051	-0.037	0.002	-0.076	-0.072	-0.072	-0.074	-0.081	-0.095	-0.031	-0.071	-0.022	-0.087	-0.058	-0.079	-0.034
rrnL	0.357	0.343	0.361	0.238	0.413	0.354	0.321	0.399	0.383	0.377	0.354	0.246	0.319	0.402	0.343	0.442	0.468
rrnS	0.238	0.29	0.322	0.115	0.464	0.34	0.37	0.36	0.307	0.378	0.3	0.233	0.229	0.308	0.358	0.377	0.399
tRNAs	0.009	0.023	0.035	0.043	0.033	0.004	0.022	0.018	-0.017	0.029	0.04	0.027	0.017	0.039	0.039	0.033	-0.003
AT content
atp6	63.5	68.2	61.4	70.5	67.4	68.4	68.1	62.8	68.6	68.2	63.4	61.7	61.9	62.5	63.8	70.6	68.4
atp8	66	72.4	68.5	76.1	66	77.6	75	66.7	75.1	73.8	65.3	64.1	62.9	70.5	66.7	77.4	70.4
cox1	57.9	64.6	58.7	63.9	62.3	63.7	62.5	59.2	62.5	63.9	59.7	59.3	59.9	60.3	61.4	62.9	61.7
cox2	58.2	67	57.5	67.5	62.4	65.4	64.1	59.9	63.4	65.4	60.5	62	61.1	64.6	63.3	63.3	65.4
cox3	58.7	65.4	57	64.8	63.5	60.6	60	56.6	63.7	62.6	59.5	57.5	57.9	60.8	59.6	65.6	63
cytb	63.4	67.6	62.7	66.5	64.9	69.2	65.6	59.6	66.4	66.9	64.8	61.9	64	65.6	64.1	66.3	67
nad1	61.3	69.7	61	66.6	66	69	66.1	61.2	66.1	69.7	63.1	63.1	60.6	65.7	65.7	68.7	66.6
nad2	65.7	68.1	62.9	73.1	72.4	68.9	68.6	61.6	71.1	66.8	66.9	62.7	64.7	64.5	70.1	76.5	68.2
nad3	63.3	67.5	58.5	69.4	67.3	68.4	67.2	60.5	66.4	64.2	62.7	58.7	61	63	65.8	70.1	62.1
nad4	63.7	69.3	64	69.3	68.3	70	66.1	60.3	69.9	66.6	66.1	60.5	62.5	66.1	65.8	68.4	67.1
nad4L	68.7	73.2	66	70.8	73.2	69.1	67.1	67	75.5	66.7	65.3	64.7	70.1	71.1	75	74.9	69.7
nad5	61.7	68.8	61.7	70.1	66.6	68.9	65.4	58.3	68.8	68.3	63.3	61.1	64.1	65.1	65	70	68.4
nad6	65.9	71	65.1	77.3	70	71.3	69.9	62.3	71.8	71.3	66	62.4	68.7	68.1	70.8	70.1	68.3
rRNAs	68.5	73.6	65	73.6	73.8	69.6	71.3	66.3	74.5	71.8	69	64.9	72.4	69.9	73.9	76.5	73.3
rrnL	68.9	73.1	66	73.9	73.4	71	71.5	67.9	72.7	73.7	70.2	65.8	67.1	71.4	71.7	75.2	71.7
rrnS	68.2	74.1	63.4	73.2	74.4	67.3	70.9	64.1	77.2	68.8	67.1	63.4	75.6	67.8	77.1	78.4	75.4
tRNAs	65.2	68.8	64.1	74.7	70.3	67.5	67.3	65.4	71.6	66.7	66.5	67.7	66.3	65.8	69.1	70.3	69.4
GC content
atp6	36.5	31.9	38.5	29.4	32.6	31.6	32	37.2	31.4	31.9	36.7	38.3	38.1	37.5	36.1	29.4	31.5
atp8	34	27.6	31.4	23.9	33.9	22.4	25	33.4	24.9	26.3	34.7	35.9	37.1	29.6	33.4	22.7	29.6
cox1	42.1	35.4	41.4	36.1	37.6	36.3	37.5	40.8	37.5	36	40.4	40.7	40.1	39.7	38.6	37.1	38.2
cox2	41.8	33	42.6	32.4	37.6	34.6	35.9	40.1	36.6	34.6	39.5	38	38.9	35.3	36.7	36.7	34.5
cox3	41.3	34.6	43	35.2	36.5	39.4	39.9	43.4	36.2	37.4	40.5	42.5	42.1	39.2	40.3	34.4	37
cytb	36.6	32.4	37.3	33.5	35.1	30.8	34.4	40.4	33.7	33.1	35.3	38.1	35.9	34.4	35.9	33.7	33
nad1	38.7	30.4	39	33.4	34	31.1	33.9	38.8	33.8	30.3	36.8	36.8	39.4	34.3	34.3	31.3	33.3
nad2	34.3	31.9	37.1	26.8	27.7	31	31.3	38.4	29	33.2	33.1	37.3	35.3	35.5	29.9	23.5	31.8
nad3	36.8	32.5	41.6	30.5	32.7	31.6	32.8	39.5	33.6	35.9	37.3	41.2	39	37	34.2	29.9	37.9
nad4	36.3	30.7	36.1	30.7	31.8	30	33.8	39.7	30.2	33.4	33.9	39.5	37.5	33.9	34.2	31.6	32.8
nad4L	31.3	26.9	34	29.2	26.8	30.9	33	33	24.5	33.3	34.6	35.4	29.9	28.9	25.1	25.1	30.2
nad5	38.3	31.2	38.4	29.9	33.3	31.2	34.7	41.7	31.3	31.7	36.7	38.9	35.9	35	35	30.1	31.6
nad6	34.1	29	34.9	22.7	30	28.7	30.1	37.7	28.1	28.7	33.9	37.6	31.3	31.9	29.2	29.9	31.7
rRNAs	31.4	26.5	35	26.4	26.2	30.4	28.7	33.7	25.5	28.2	31	35.1	27.6	30.1	26.1	23.5	26.8
rrnL	31.1	26.8	34	26.2	26.6	29.1	28.5	32.2	27.2	26.3	29.8	34.2	32.9	28.7	28.3	24.8	28.2
rrnS	31.8	25.9	36.6	26.8	25.7	32.7	29.1	35.9	22.8	31.2	32.9	36.6	24.4	32.2	22.8	21.6	24.6
tRNAs	34.8	31.1	35.9	25.3	29.6	32.6	32.7	34.6	28.4	33.3	33.5	32.2	33.7	34.2	30.9	29.7	30.6
Footnote:
G_l: Gammarus lacustris
G_p: Gammarus pisinnus
G_d: Gammarus duebeni NC_017760.1
M_r: Metacrangonyx remyi NC_019660.1
P_dav: Pseudoniphargus daviui NC_019662.2
E_ve: Eulimnogammarus verrucosus NC_023104.1
E_vi: Eulimnogammarus vittatus NC_025564.1
B_g: Brachyuropus grewingkii NC_026309.1
S_i: Stygobromus indentatus NC_030261.1
E_c: Eulimnogammarus cyaneus NC_033360.1
G_fa: Gmelinoides fasciatus NC_033361.1
P_k: Pallaseopsis kessleri NC_033362.1
G_fo: Gammarus fossarum NC_034937.1
G_r: Gammarus roeselii NC_037481.1
P_c: Pseudoniphargus carpalis NC_039353.1
P_s: Pseudoniphargus stocki NC_039354.1
P_dae: Pseudocrangonyx daejeonensis NC_039646.1
N/A: Not Available
